# Supplementary material for: Alleloscope: Integrative single cell analysis of allele-specific copy number alterations and chromatin accessibility in cancer
Source: bioRxiv or medRxiv preprint supplement (doi:10.1101/2020.10.23.349407), 2021-03-18
Supplement: Supplementary file [file media-1.pdf]

1 **Supplementary Information**

2 **Table of Contents**

3 **Supplementary Figures ..... 2**

4 Fig. 1. Validation of Alleloscope genotyping results for the P6335 colorectal cancer  
5 sample with linked-reads sequencing data..... 2

6 Fig. 2. Heatmaps of allele-specific genotypes and haplotype-specific genotypes from  
7 CHISEL for the P5931 sample ..... 3

8 Fig. 3. Phasing accuracy for the CNA regions in the P6198 sample by comparing to the  
9 matched linked-reads sequencing data ..... 4

10 Fig. 4. Segmentation plot and genotype heatmap for the P6198 sample..... 5

11 Fig. 5. Segmentation plot and genotype heatmap for the P6335 sample..... 6

12 Fig. 6. Segmentation plot and genotype heatmap for the BC10X sample..... 7

13 Fig. 7. Segmentation plot and genotype heatmap for the P5846 sample..... 8

14 Fig. 8. Segmentation plot and genotype heatmap for the P5847 sample..... 9

15 Fig. 9. Segmentation plot and genotype heatmap for the P5915 sample..... 10

16 Fig. 10. Segmentation plot and genotype heatmap for the P6461 sample..... 11

17 Fig. 11. Single cell genotyping of CNV events by Alleloscope for scATAC-seq data of  
18 a basal cell carcinoma sample (SU006)..... 12

19 Fig. 12. Confidence scores for the genotype assignment of each cell in each region for  
20 the SNU601 scDNA-seq dataset ..... 13

21 Fig. 13. Distribution of the posterior confidence scores of subclone assignment for the  
22 2,753 cells from SNU601 scATAC-seq ..... 14

23 Fig. 14. Power for the detection of 1 copy deletion and 1 copy amplification for data of  
24 varying coverage, heterozygous SNP count, and number of cells ..... 15

25

26 **SUPPLEMENTARY METHODS ..... 16**

27 Simulation and power analysis ..... 16

28

29 **Supplementary Figures**

**Supplementary Figure 1.**

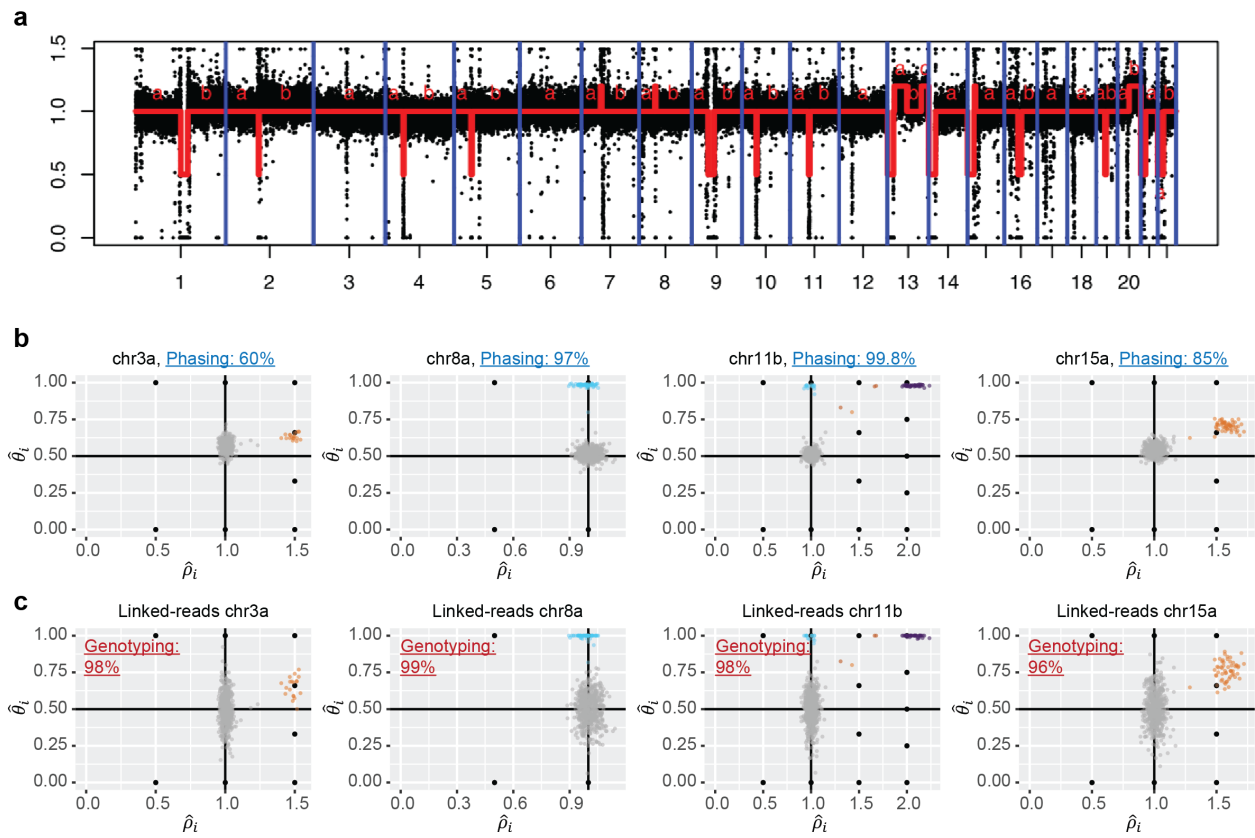

30

31

32 **Supplementary Fig. 1: Validation of Alleloscope genotyping results for the P6335**  
 33 **colorectal cancer sample with linked-reads sequencing data.** (a) Segmentation of the  
 34 pooled scDNA-seq data using the HMM algorithm. (b)  $\hat{\theta}_i$  values recapitulate CNV carriers  
 35 that are detected using only coverage for four chromosomal regions on the P6335 tumor  
 36 sample. Different colors represent different genotype clusters. Phasing accuracy for each  
 37 region is shown in the title. (c)  $\hat{\theta}_i$  calculation using known SNP phases from paired linked-  
 38 reads sequencing data. Genotyping accuracy is labeled in the plots. The colors follow the  
 39 clustering results from b. The color scheme is the same as that in Fig. 2 and  
 40 Supplementary Fig. 5.

Supplementary Figure 2.

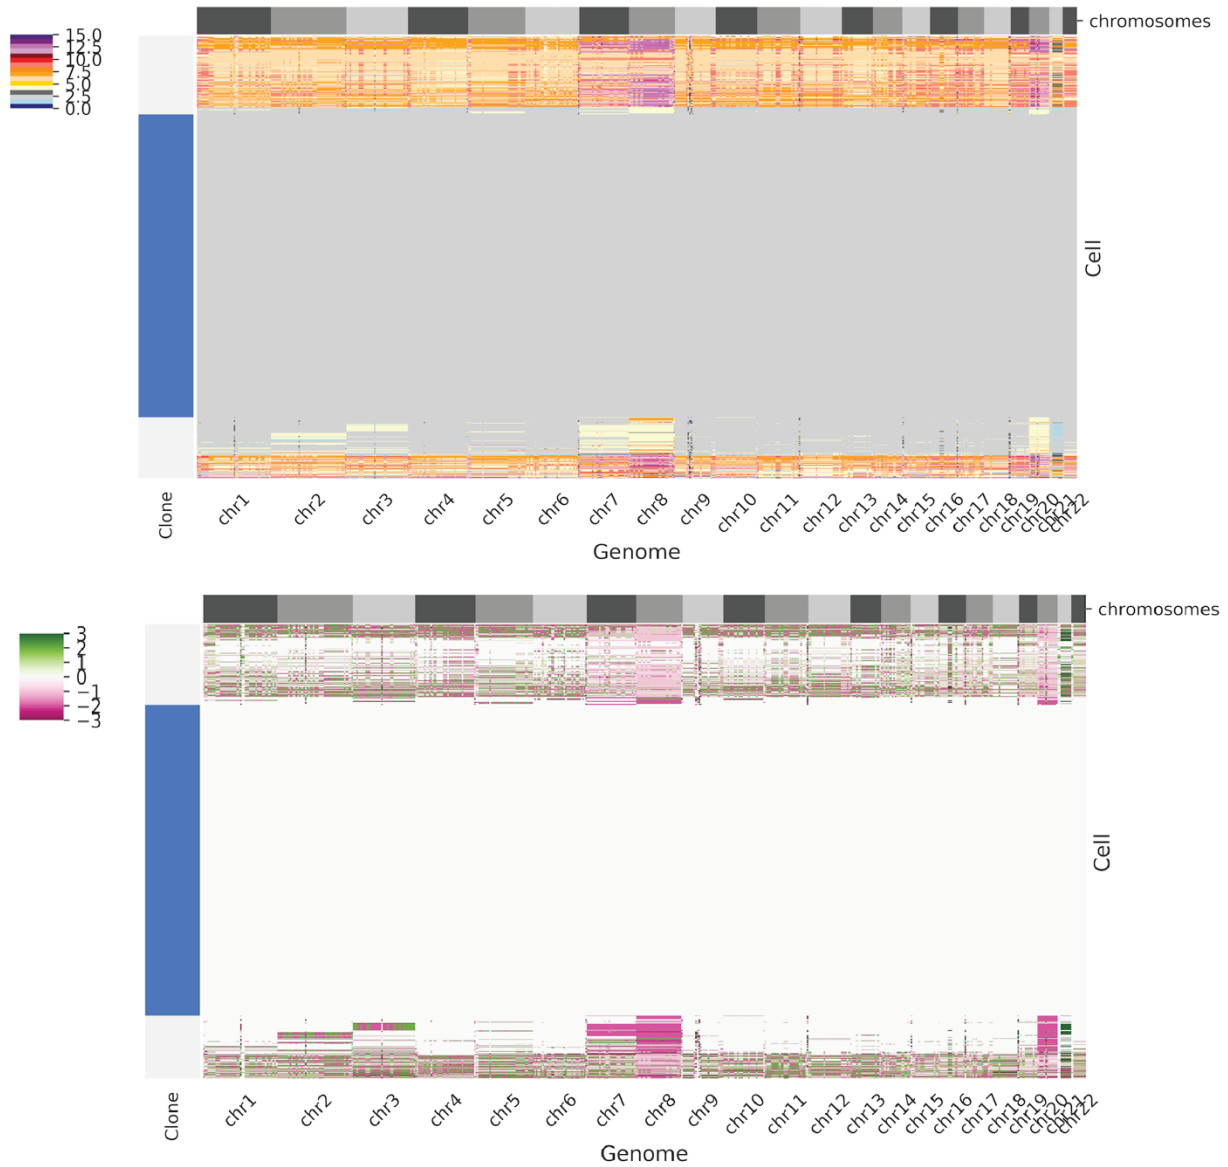

41  
42 **Supplementary Fig. 2: Heatmaps of allele-specific genotypes and haplotype-**  
43 **specific genotypes from CHISEL for the P5931 sample.**

### Supplementary Figure 3.

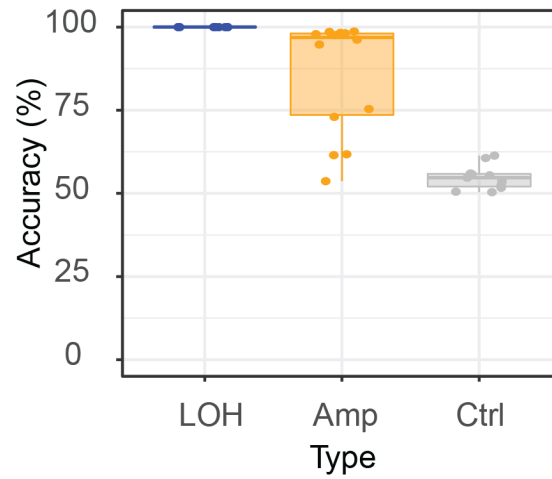

44

45 **Supplementary Fig. 3: Phasing accuracy for the CNA regions in the P6198 sample**  
46 **by comparing to the matched linked-reads sequencing data.** LOH: segments with  
47 any LOH events. Amp: segments with amplifications that lead to allelic imbalance. Ctrl:  
48 control segments without allelic imbalance.

### Supplementary Figure 4.

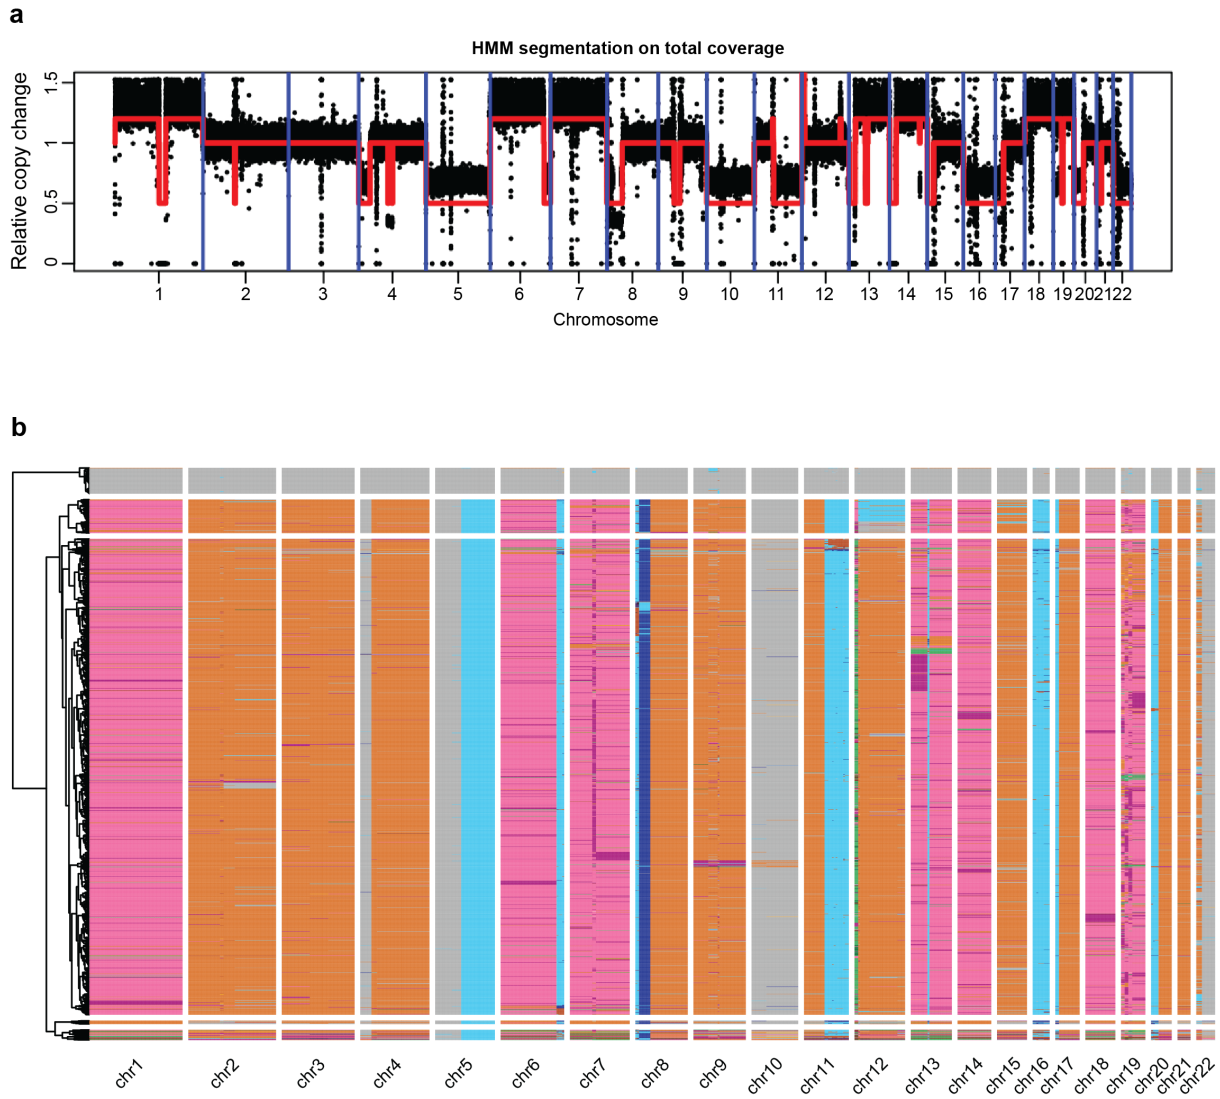

49

50

51

**Supplementary Fig. 4: Segmentation plot and genotype heatmap for the P6198 sample.** The color scheme is the same as that in Fig. 2 and Supplementary Fig. 5.

## Supplementary Figure 5.

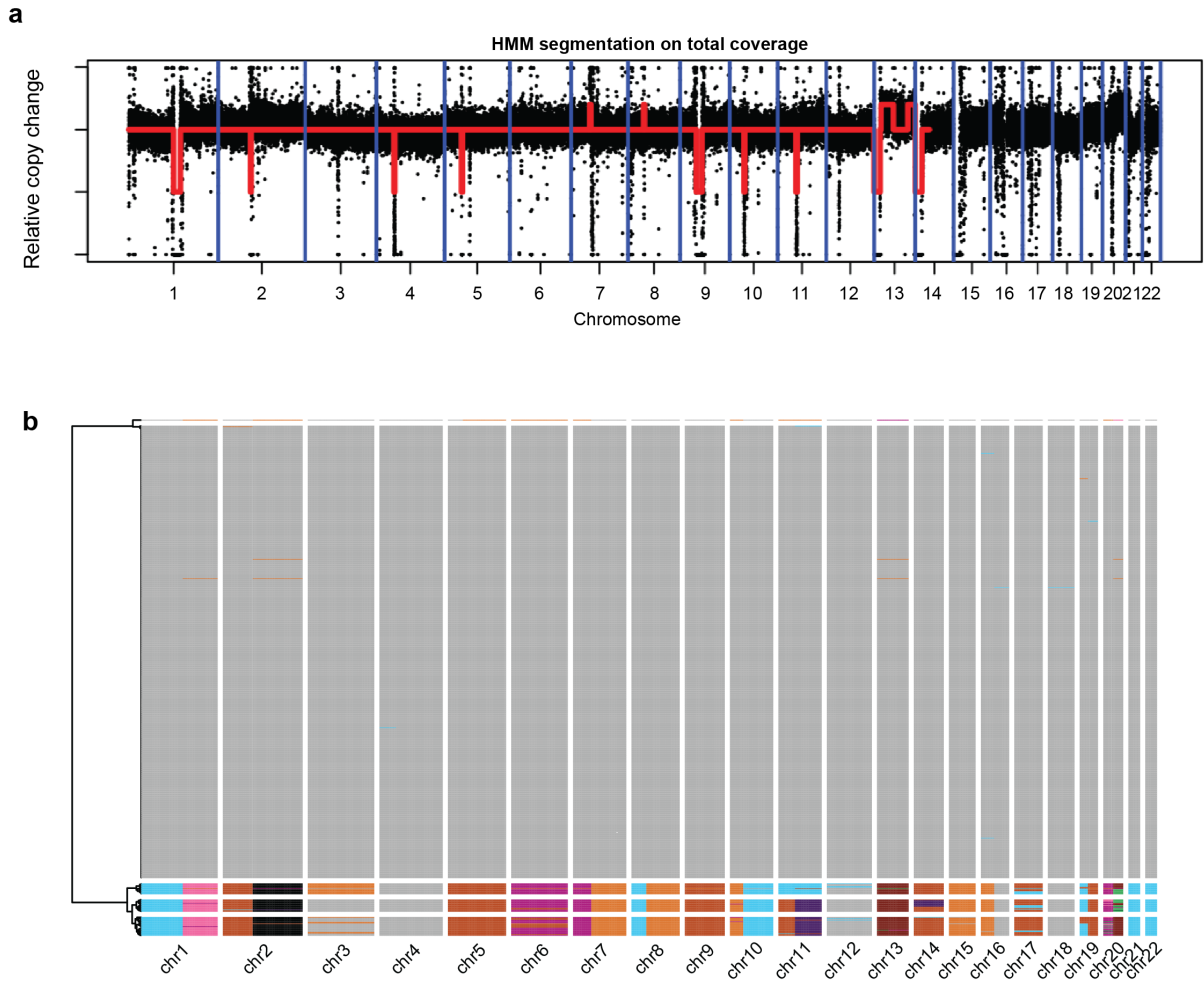

52

53 **Supplementary Fig. 5: Segmentation plot and genotype heatmap for the P6335**  
54 **sample.** The color scheme is the same as that in Fig. 2 and Supplementary Fig. 5.

## Supplementary Figure 6.

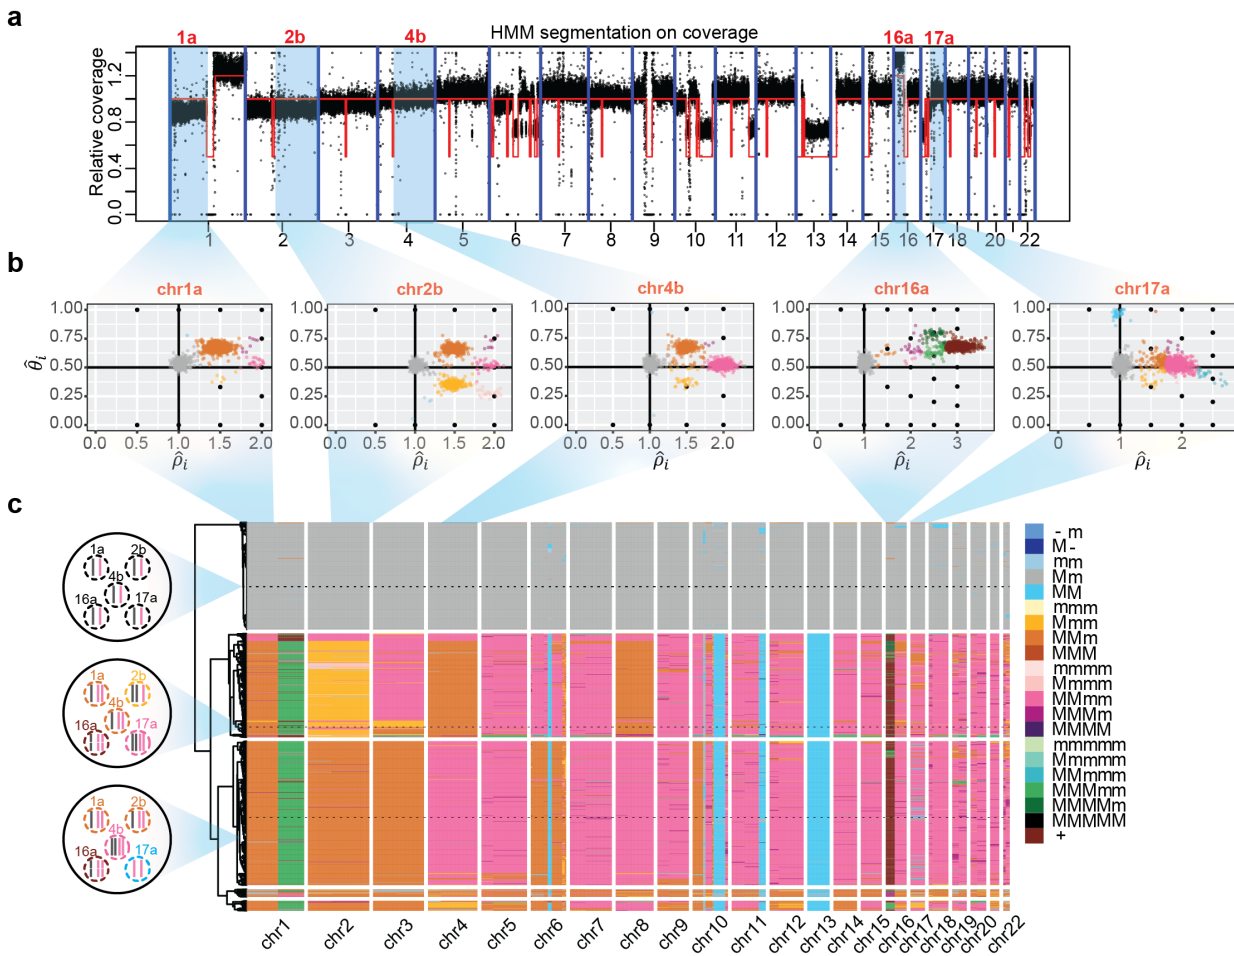

55

56 **Supplementary Fig. 6: Segmentation plot and genotype heatmap for the BC10X**  
 57 **sample.** (a) Genome segmentation using HMM on the pooled coverage signals across  
 58 the cells. (b) Genotype profiles of five example regions. The coloring scheme is same as  
 59 that in part (c). (c) Hierarchical clustering of single-cell ASCN genotypes reveals complex  
 60 subclone structure. Genotypes of the five regions in three example cells from the three  
 61 major subclones are shown in the left. Different colors represent different genotypes. In  
 62 the color panel, M and m represent the “Major haplotype” and “minor haplotype”  
 63 respectively.

### Supplementary Figure 7.

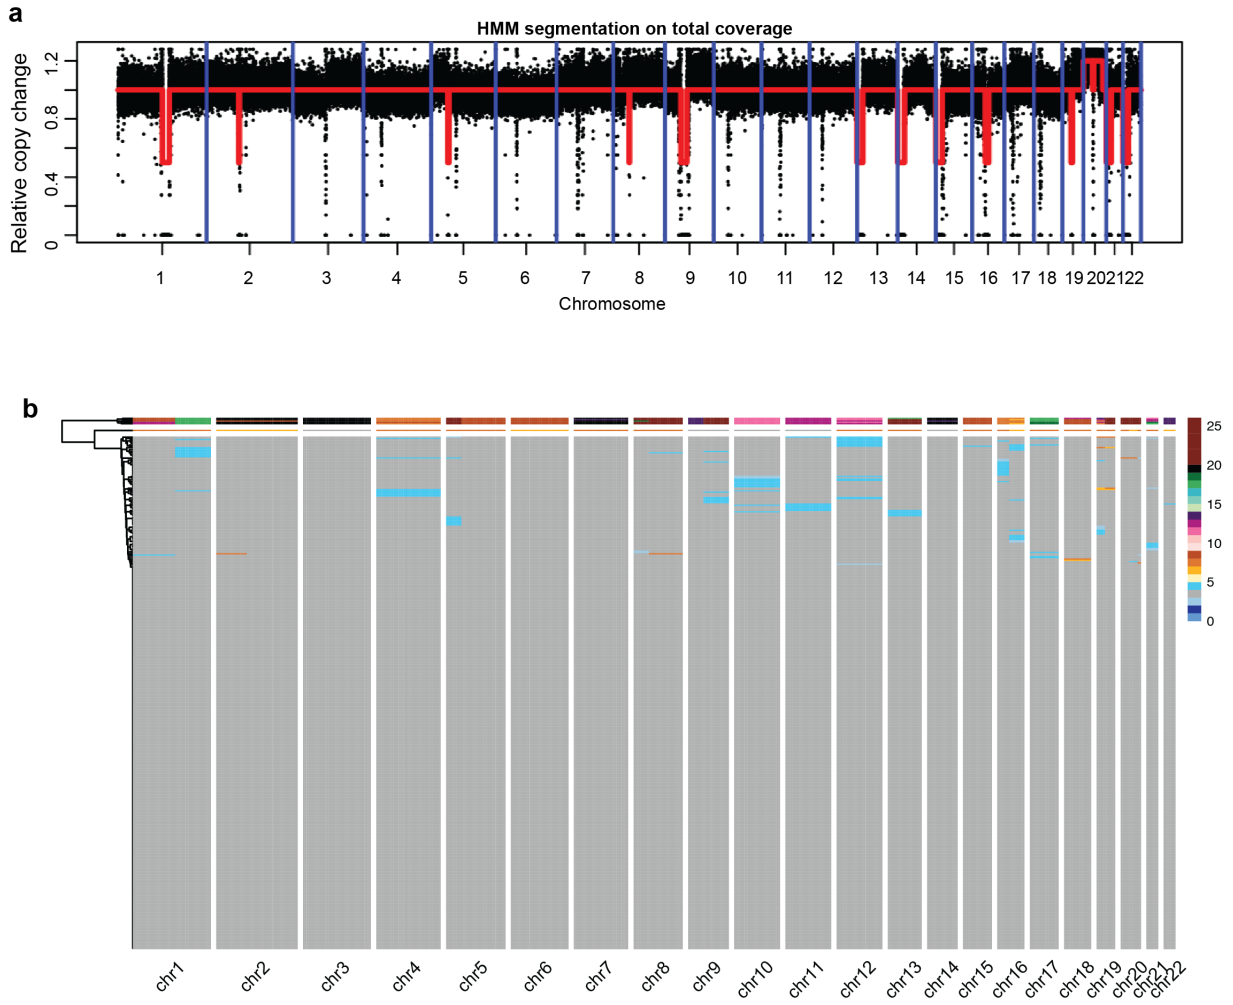

64

65 **Supplementary Fig. 7: Segmentation plot and genotype heatmap for the P5846**  
66 **sample.** The color scheme is the same as that in Fig. 2 and Supplementary Fig. 5.



# Supplementary Figure 8.

a

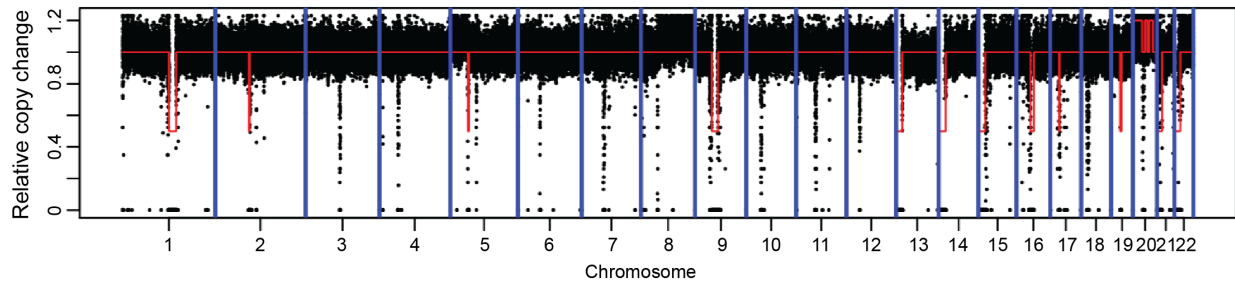

b

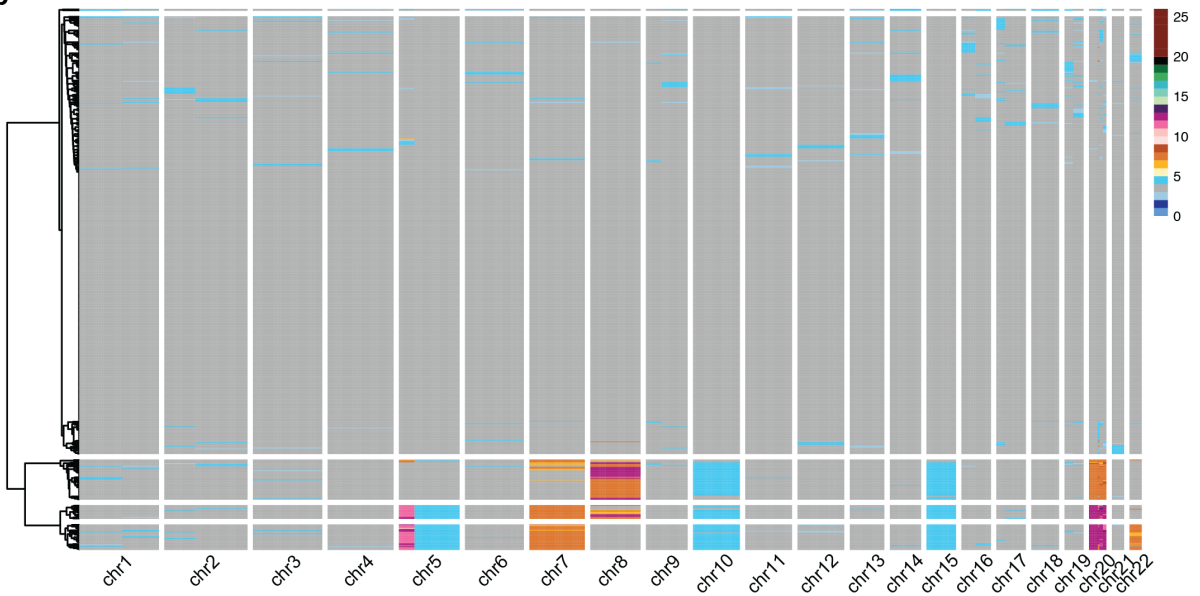

67

68 **Supplementary Fig. 8: Segmentation plot and genotype heatmap for the P5847**  
69 **sample.** The color scheme is the same as that in Fig. 2 and Supplementary Fig. 5.

### Supplementary Figure 9.

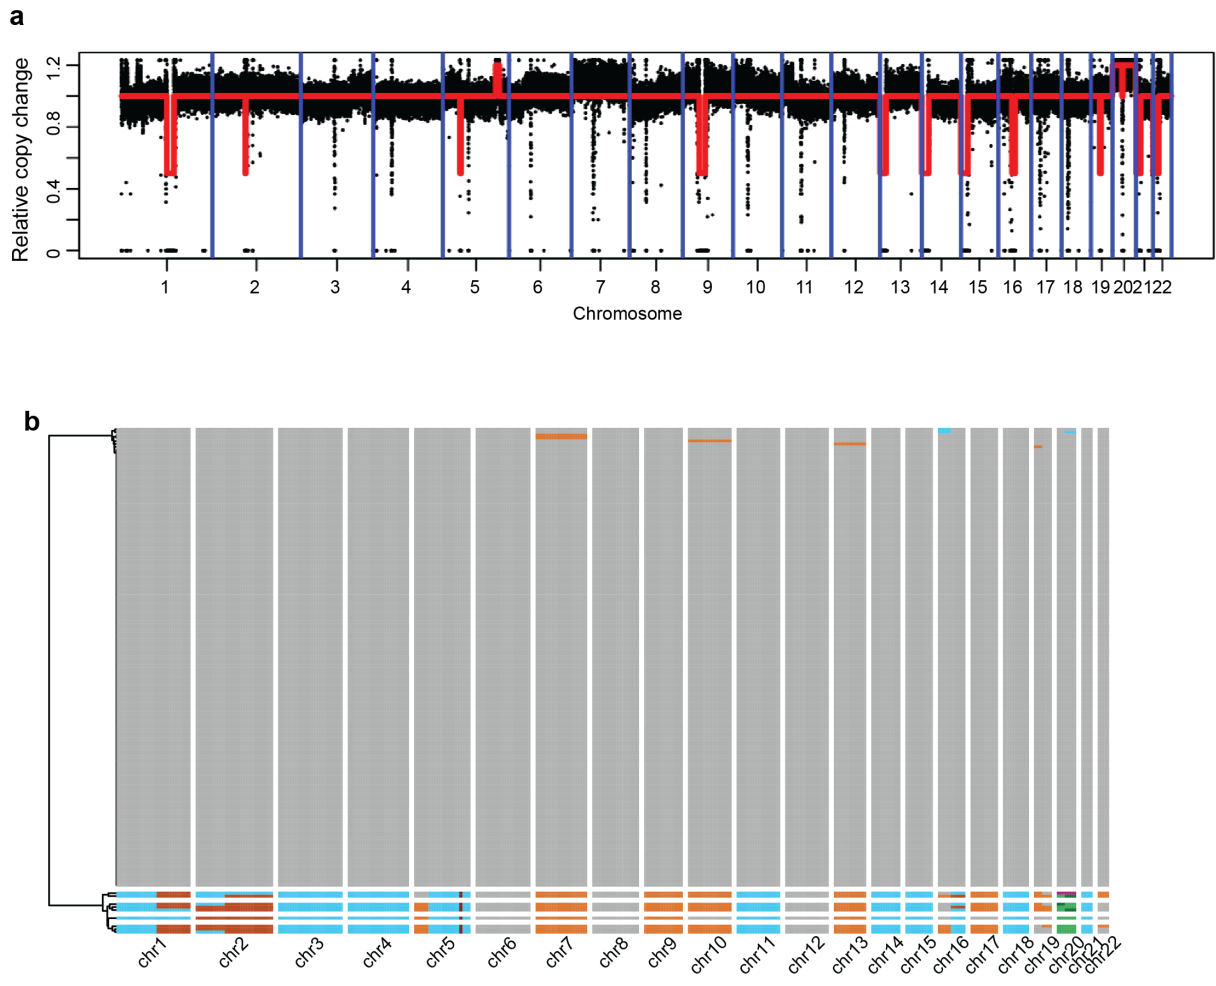

70

71 **Supplementary Fig. 9: Segmentation plot and genotype heatmap for the P5915**  
72 **sample.** The color scheme is the same as that in Fig. 2 and Supplementary Fig. 5.

### Supplementary Figure 10.

**a**

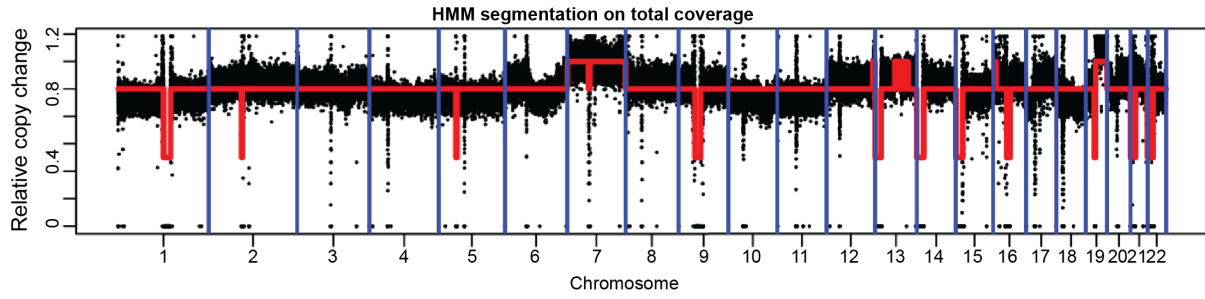

**b**

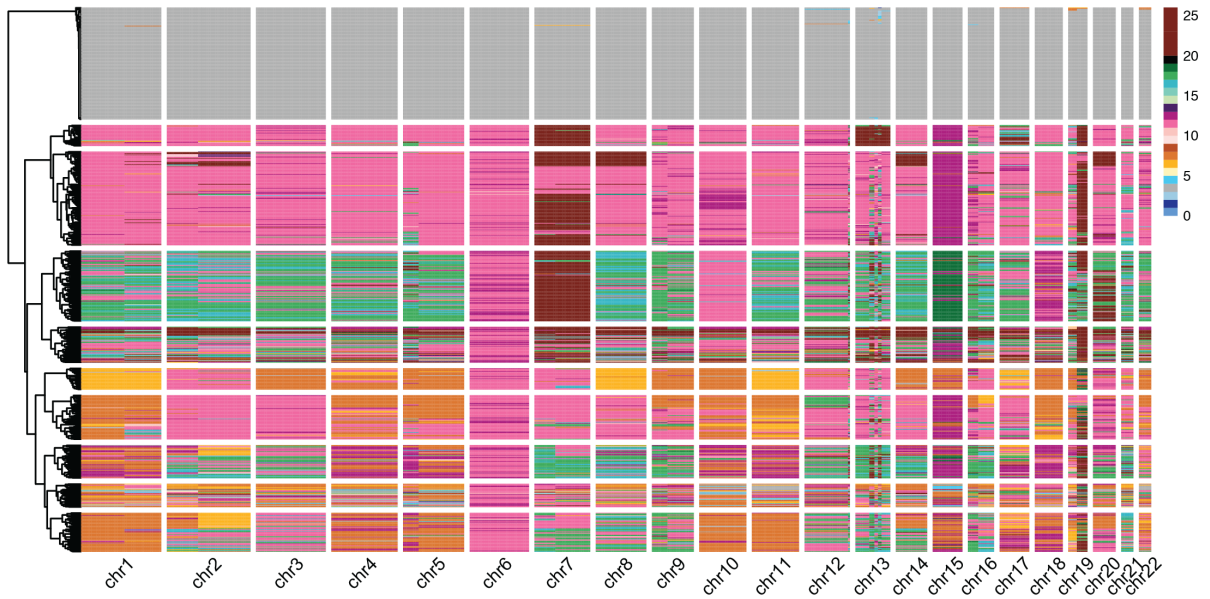

73

74 **Supplementary Fig. 10: Segmentation plot and genotype heatmap for the P6461**  
75 **sample.** The color scheme is the same as that in Fig. 2 and Supplementary Fig. 5.

Supplementary Figure 11.

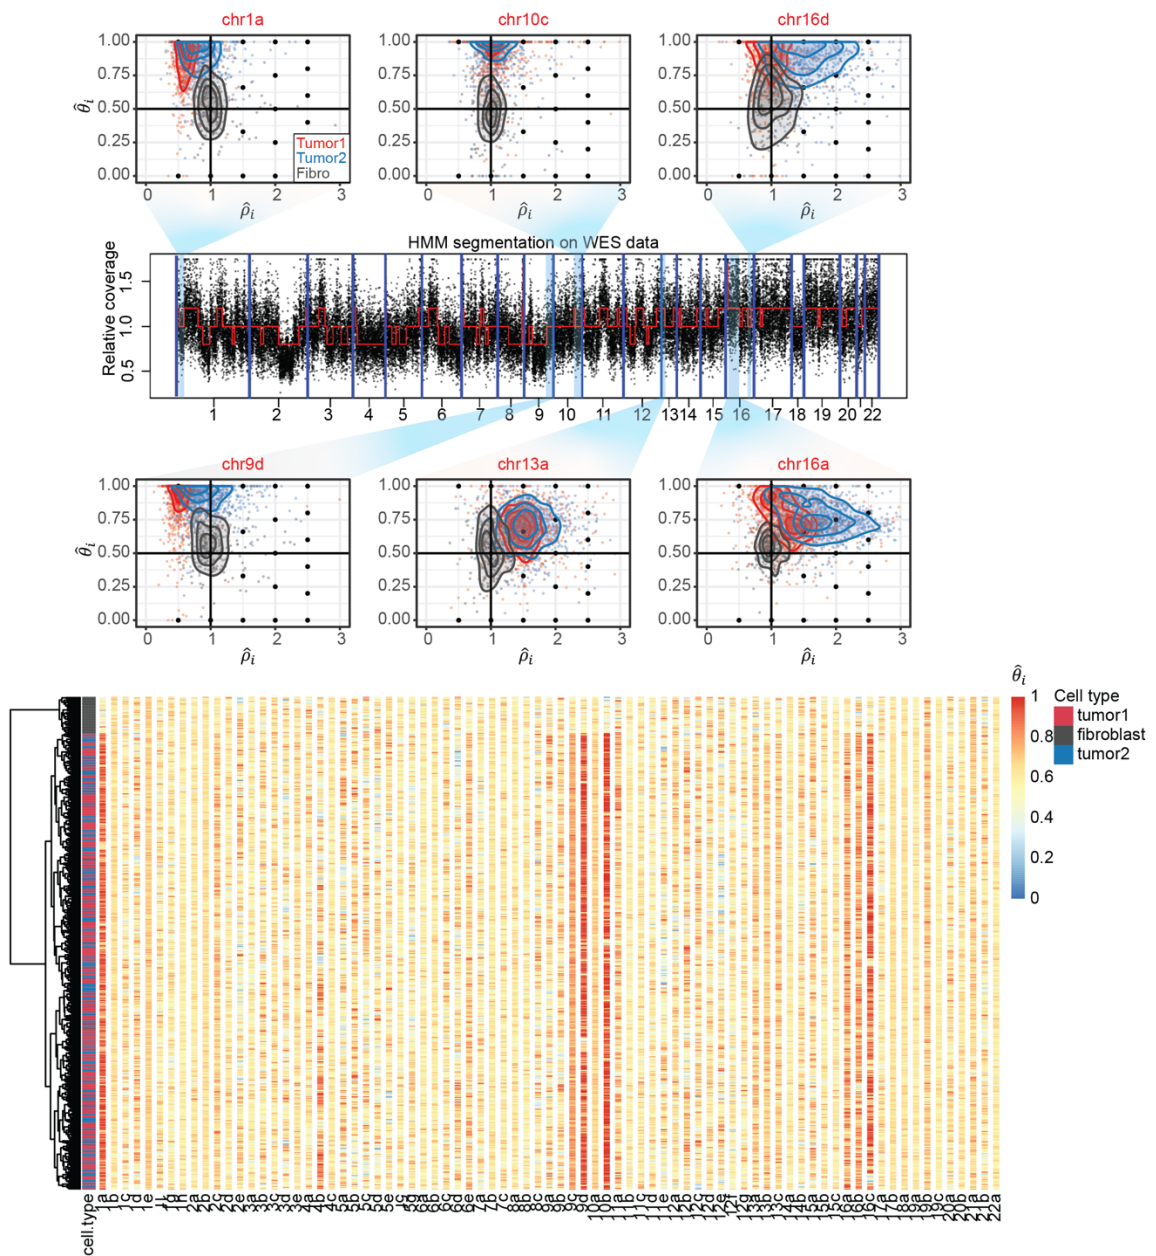

76

77 **Supplementary Fig. 11: Single cell genotyping of CNV events by Alleloscope for**  
 78 **scATAC-seq data of a basal cell carcinoma sample (SU006<sup>1</sup>).** (a) Genotype profiles  
 79 of six example regions. The regions were taken from the segmentation of whole exome  
 80 sequencing (WES) data. Each dot represents a cell-specific ( $\hat{\rho}_i$ ,  $\hat{\theta}_i$ ) pair. Cells are colored  
 81 by annotation derived from peak signals<sup>1</sup>. Two tumor cell clusters, identified using ATAC  
 82 peaks, are labeled by red and blue; fibroblasts (Fibro) are labeled by grey. Density  
 83 contours of the three cell subpopulations are also shown. (b) Hierarchical clustering of  
 84 cells in scATAC-seq by  $\hat{\theta}_i$  reveals that the two tumor subpopulations are differentiated by  
 85 peak signals that don't correlate with broad copy number events.

Supplementary Figure 12.

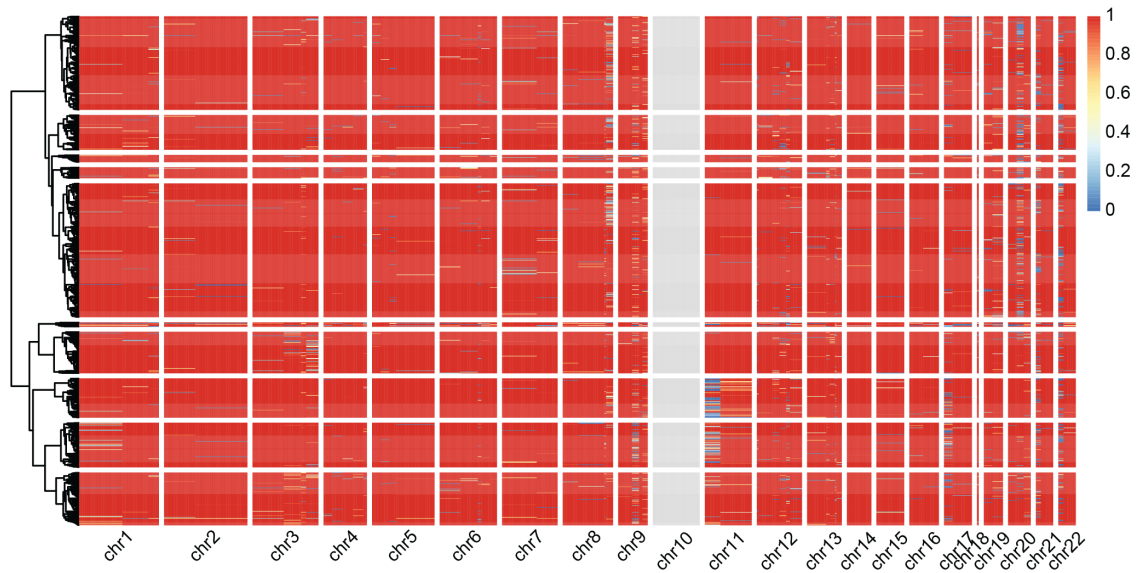

86

87 **Supplementary Fig. 12: Confidence scores for the genotype assignment of each**  
88 **cell in each region for the SNU601 scDNA-seq dataset.**

**Supplementary Figure 13.**

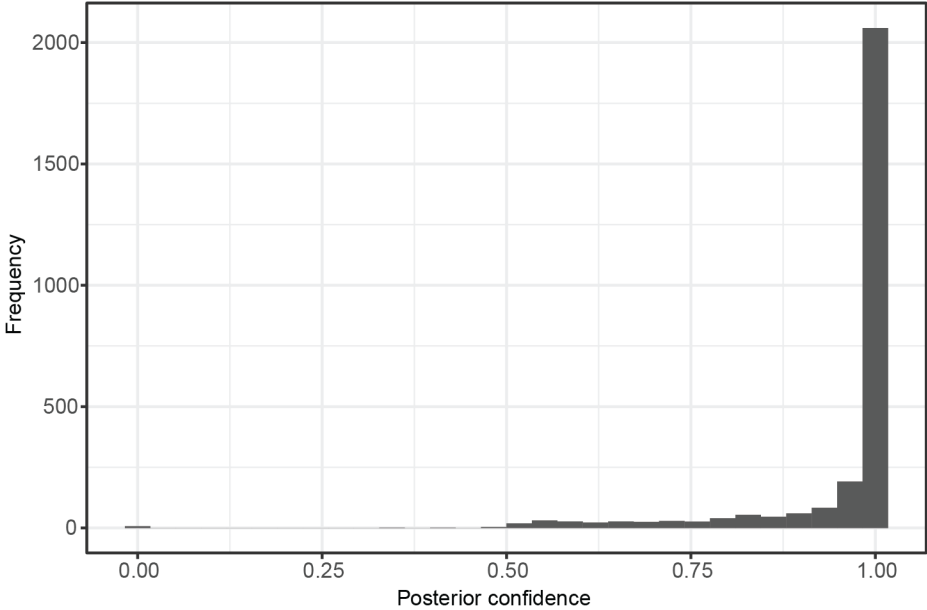

89

90

91

**Supplementary Fig. 13: Distribution of the posterior confidence scores of subclone assignment for the 2,753 cells from SNU601 scATAC-seq.**

## Supplementary Figure 14.

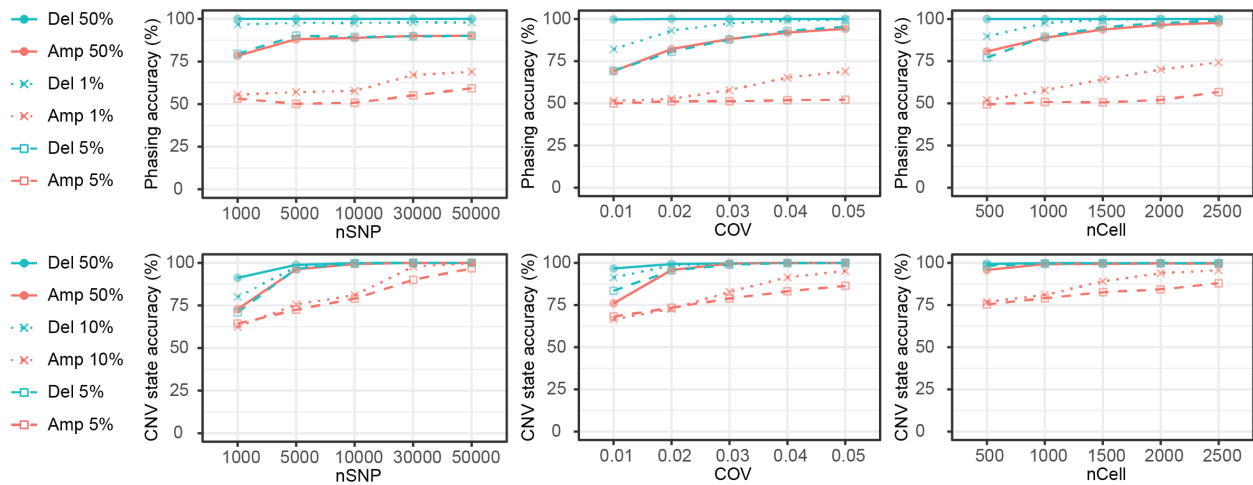

92

93 **Supplementary Fig. 14: Power for the detection of 1 copy deletion and 1 copy**  
 94 **amplification for data of varying coverage (per base), heterozygous SNP count, and**  
 95 **number of cells.** The heterozygous SNP count reflects the size of the region: larger  
 96 regions contain more heterozygous loci. Cells were clustered based on the minimum  
 97 distance of  $\hat{\theta}_i$  to the canonical values. Top: phasing accuracy, defined as the proportion  
 98 of SNPs with  $\hat{I}_j$  correctly estimated; bottom: cell CNV state accuracy, defined as the  
 99 proportion of cells that are correctly assigned to carrier state. Amp: amplification. Del:  
 100 deletion. Line types represent different proportions (0.5%, 0.1% and 0.05%) of carrier  
 101 cells. The number of SNPs, coverage, number of cells and purity were set as 10,000,  
 102 0.03, 1000, and 0.5 if not specified.

103 **Supplementary Methods**

104 **Simulations and Power Analysis**

105 For a simulated region, let  $n$  be the number of cells,  $m$  be the number of heterozygous  
106 SNPs,  $\theta$  be the major haplotype proportion, and  $\mu_i$  be the total coverage of cell  $i$  sampled  
107 from the cells on chr7 in the P5931 tumor sample. For cell  $i$ , we simulated total coverage  
108 of SNP  $j$  ( $\mu_{ij}$ ) using a Poisson distribution

109 
$$\mu_{ij} \sim \text{Poisson}(\mu_i),$$

110 where  $i = 1 \sim n$ . Parallely, phases of SNP  $j$  ( $I_j$ ) were simulated under a Bernoulli  
111 distribution

112 
$$I_j \sim \text{Bernoulli}(0.5),$$

113 where  $I_j$  indicates whether a reference allele is on the major haplotype for SNP  $j$ , and  
114  $j=1 \sim m$ . Using  $\mu_{ij}$  and  $I_j$ , simulated read counts of reference alleles of SNP  $j$  in cell  $i$  ( $A_{ij}$ )  
115 were simulated under a Binomial distribution

116 
$$A_{ij} \sim \text{Binomial}(\mu_{ij}, p_{ij}),$$

117 where  $p_{ij}$  is the proportion of the reference allele at loci  $j$  in cell  $i$  with the values shown in  
118 the following table

| $p_{ij}$  | cell $i$ with CNA | cell $i$ without CNA |
|-----------|-------------------|----------------------|
| $I_j = 1$ | $\theta$          | 0.5                  |
| $I_j = 0$ | $1 - \theta$      | 0.5                  |

119



120 Then simulated read counts of alternative alleles of SNP  $j$  in cell  $i$  ( $B_{ij}$ ) were retrieved by

$$121 \quad B_{ij} = \mu_{ij} - A_{ij}$$

122 In the first simulation used to illustrate distribution of the estimates from Alleloscope, we  
123 fixed the cell number  $n$  to be 1,000, the SNP number  $m$  to be 10,000 which are typical in  
124 real datasets.  $\theta$  was set to be 1 and 0.66 for cells carrying deletion and one-copy  
125 amplification respectively with the purity equal to 0.5. On the simulated  $A_{ij}$  and  $B_{ij}$   
126 matrices Alleloscope estimated phases for each SNP and CNA states for each cell.  
127 Distribution of the estimated values versus the true values are visualized using boxplots.

128 To know the effects of SNP numbers, cell coverage, cell numbers, and purity, power  
129 analysis was performed for one-copy deletion and one-copy amplification scenarios.

130 We assessed the accuracy for phasing and cell-level CNA state estimation under the  
131 following scenarios: SNP numbers from 1,000 to 50,000, mean coverage from 0.01 to  
132 0,05 for each cell, cell number from 500 to 2500. For different scenarios, we assessed  
133 the effect of three purity: 0.5, 0.1, and 0.01, reflecting from larger subclones to rare  
134 subclones. All parameters remained the same as those in the previous paragraph except  
135 for the parameters that were assessed. Phasing accuracy was calculated by comparing  
136 true  $I_j$ 's and estimated  $\hat{I}_j$ 's in the region. If  $\hat{I}_j \geq 0.5$ , the values were considered as 1.  
137 Otherwise, the values were considered 0. On the other hand, the accuracy of cell CNA  
138 state estimation was the clustering accuracy using the estimated  $\hat{\theta}_i$  values. Cells with  $\hat{\theta}_i$   
139 values smaller than the midpoints between true  $\theta$  of normal cells ( $\theta_o = 0.5$ ) and true  $\theta$  of  
140 carriers ( $\theta_{del} = 1$ ;  $\theta_{amp} = 0.66$ ) were considered as normal cells; otherwise, cells were

141 considered as carriers. The clustering accuracy was calculated by comparing the clusters  
142 to the true cell states.

143 **Reference**

- 144 1. Satpathy, A.T. et al. Massively parallel single-cell chromatin landscapes of human  
145 immune cell development and intratumoral T cell exhaustion. *Nat Biotechnol* **37**,  
146 925-936 (2019).

147
